# Supplementary material for: Exploration of the electrocatalytic activity of nonlinear optically active CuWO 4 /g-C 3 N 4 nanocomposites
Source: Royal Society of Chemistry journal article supplement (doi:10.1039/d5dt01694k), 2025-01-01
Supplement: d5dt01694k1.pdf [file d5dt01694k1.pdf]

## Exploration of electrocatalytic activity of nonlinear optically active CuWO<sub>4</sub>/g-C<sub>3</sub>N<sub>4</sub> nanocomposites

Sanghavi B<sup>1</sup>, Aravinth K<sup>\*1</sup>, Manikandan Kandasamy<sup>2,3</sup>, P Balaji Bhargav<sup>1\*</sup>, Brahmananda Chakraborty<sup>\*4,5</sup>

<sup>1</sup>Department of Physics, Sri Sivasubramaniya Nadar College of Engineering, Chennai - 603110, India.

<sup>2</sup>Center for Advanced Energy Materials, Department of Physics, SRM TRP Engineering College, Tiruchirappalli 621 105, Tamil Nadu, India

<sup>3</sup>Center for Research, Easwari Engineering College, Chennai 600 089, Tamil Nadu, India

<sup>4</sup>High Pressure and Synchrotron Radiation Physics Division, Bhabha Atomic Research Centre, Mumbai- 400085, India.

<sup>5</sup>Homi Bhabha National Institute, Mumbai, India-400094

\*Corresponding

author: [aravinthk@ssn.edu.in](mailto:aravinthk@ssn.edu.in), [brahma@barc.gov.in](mailto:brahma@barc.gov.in), [balajibhargavp@ssn.edu.in](mailto:balajibhargavp@ssn.edu.in)

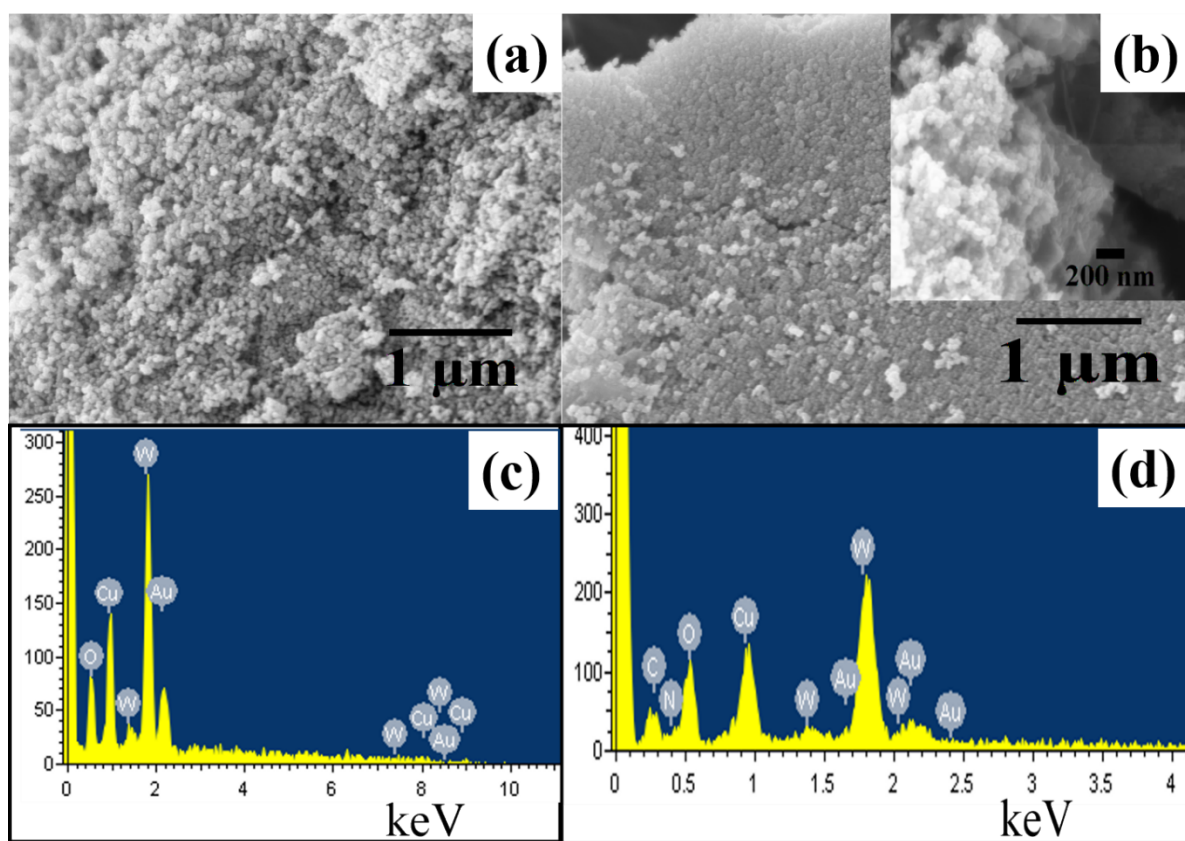

Fig. S1. (a, b) SEM micrographs of CuW and CuW/ gCN respectively (inset: high magnification) (c, d) their respective EDS spectra.

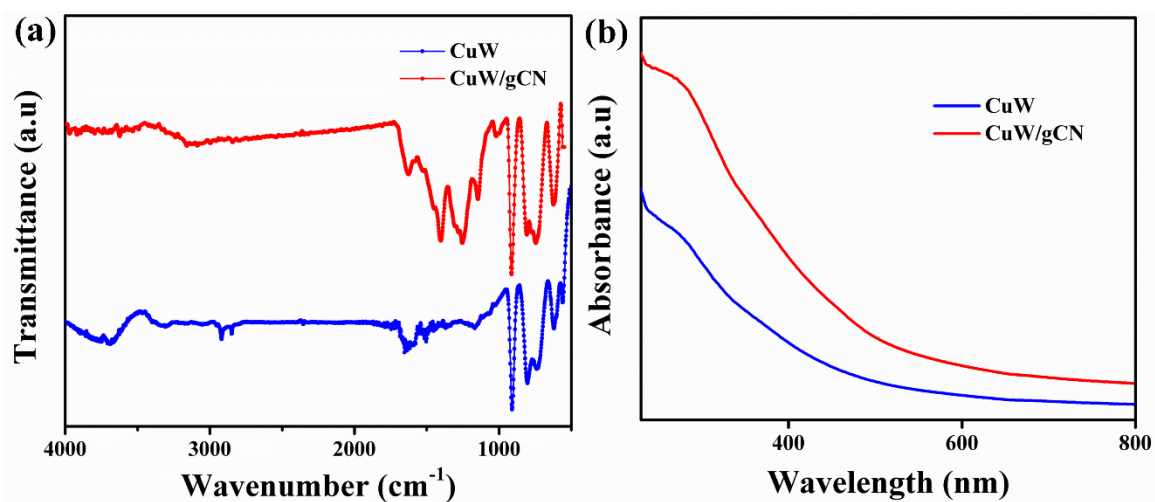

Fig. S2. (a) FTIR transmittance (4000-500  $\text{cm}^{-1}$ ) and (b) UV-Visible absorption spectra of  $\text{CuWO}_4$  and CuW/gCN samples.

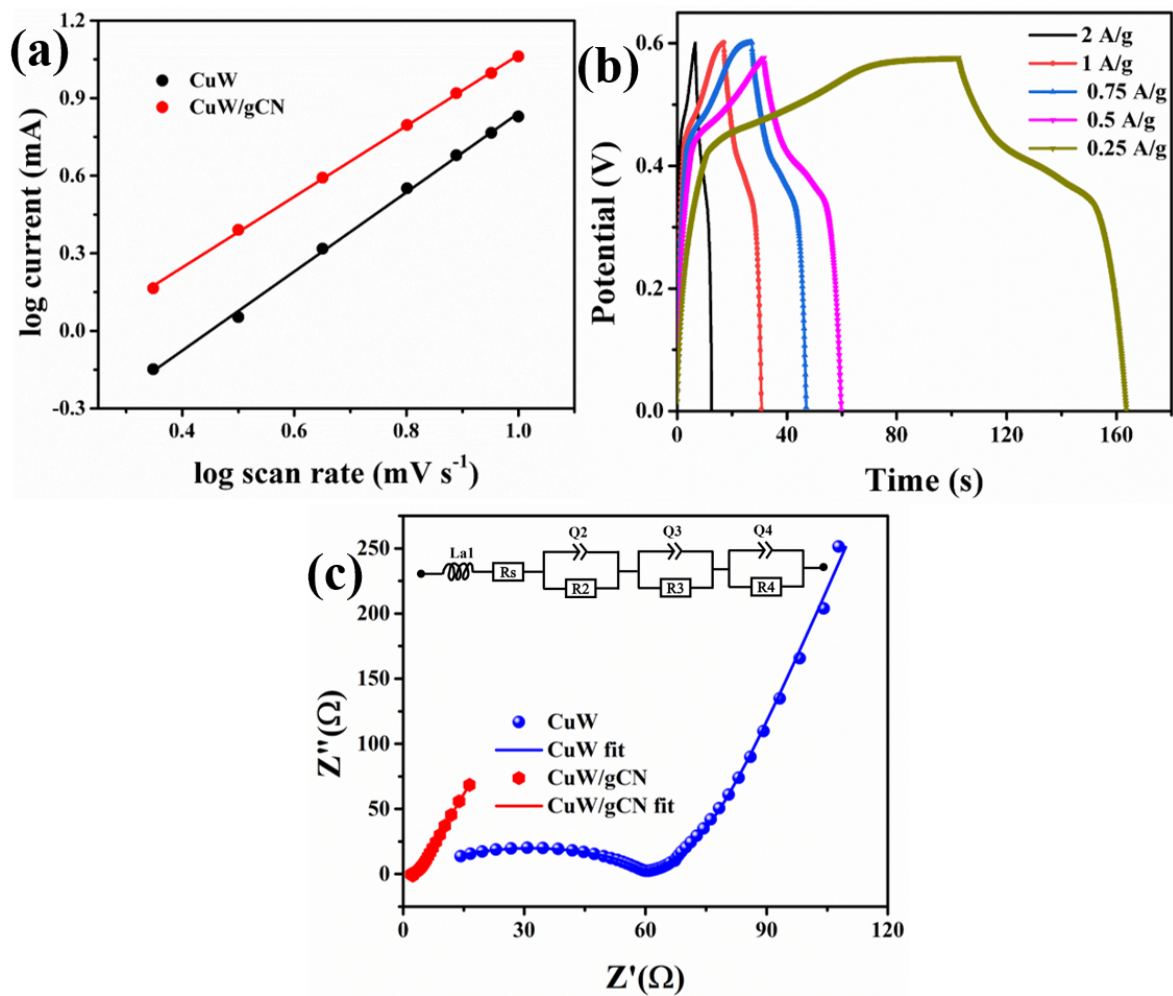

Fig. S3. (a) Dependence of cathodic peak current with scan rate ( $\log v - \log i$  plot) (b) GCD curves of CuW at different current densities (c) EIS Nyquist plots of  $\text{CuWO}_4$  and CuW/gCN samples.

Table S1. Supercapacitive parameters of  $\text{CuWO}_4/\text{g-C}_3\text{N}_4$  compared with tungstate materials.

| Material                             | Synthesis             | Capacitance (F/g) | Capacity Retention (%) | References   |
|--------------------------------------|-----------------------|-------------------|------------------------|--------------|
| $\text{ZnWO}_4$                      | Microwave irradiation | 72                | 70 (10000 cycles)      | [1]          |
| $\text{CuWO}_4$                      | Microwave irradiation | 10.06             | —                      | [2]          |
| $\text{ZnFe}_2\text{O}_4/\text{rGO}$ | Hydrothermal          | 33.6              | —                      | [3]          |
| $\text{CuWO}_4/\text{rGO}$           | Hydrothermal          | 35.71             | 100 (1000 cycles)      | [4]          |
| CuW/gCN                              | Microwave irradiation | 111               | 85 (10000 cycles)      | Present work |

Table S2. Comparison of few recently reported HER electrocatalysts.

| Material                                           | Synthesis                | Electrolyte                          | Overpotential<br>(mV) | Tafel<br>(mV/dec) | References      |
|----------------------------------------------------|--------------------------|--------------------------------------|-----------------------|-------------------|-----------------|
| NiWO <sub>4</sub> /NWS                             | Hydrothermal             | 1M KOH                               | 400                   | 66                | [5]             |
| CoMn <sub>2</sub> O <sub>4</sub> /NNF              | Hydrothermal             | 1M KOH                               | 318                   | 135.19            | [6]             |
| CoNi <sub>x</sub> O <sub>4</sub>                   | Hydrothermal             | 1M KOH                               | 259                   | 131.6             | [7]             |
| W <sub>18</sub> O <sub>49</sub> /NiWO <sub>4</sub> | Hydrothermal             | 1M KOH                               | 280                   | 101               | [8]             |
| MoS <sub>2</sub> /COF/C <sub>4</sub> N             | Hydrothermal             | 1M KOH                               | 358                   | -                 | [9]             |
| CuW/ppy                                            | Hydrothermal             | 1M KOH                               | 250                   | 50                | [10]            |
| PPy/ZnWO <sub>4</sub>                              | Hydrothermal             | 0.5 M H <sub>2</sub> SO <sub>4</sub> | 543                   | 76                | [11]            |
| CuWO <sub>4</sub>                                  | Hydrothermal             | 0.5 M H <sub>2</sub> SO <sub>4</sub> | 574                   | -                 | [12]            |
| CuW/gCN                                            | Microwave<br>irradiation | 0.5 M H <sub>2</sub> SO <sub>4</sub> | 143                   | 46                | Present<br>Work |

Table S3. Electrocatalytic OER performance of recently reported tungstate materials.

| Material                                           | Synthesis                | Electrolyte | Overpotential<br>(mV) | Tafel<br>(mV/dec) | References      |
|----------------------------------------------------|--------------------------|-------------|-----------------------|-------------------|-----------------|
| ZnWO <sub>4</sub> Nbs                              | Hydrothermal             | 1M KOH      | 475                   | 140               | [13]            |
| ZnWO <sub>4</sub>                                  | Hydrothermal             | 1M KOH      | 636                   | 155               | [11]            |
| CoMoO <sub>4</sub>                                 | Hydrothermal             | 1M KOH      | 765                   | 110               | [14]            |
| CoWO <sub>4</sub>                                  |                          |             | 810                   | 107               |                 |
| W <sub>18</sub> O <sub>49</sub> /NiWO <sub>4</sub> | Hydrothermal             | 1M KOH      | 250                   | 85                | [8]             |
| MoS <sub>2</sub> /COF/C <sub>4</sub> N             | Hydrothermal             | 1M KOH      | 349                   | -                 | [9]             |
| CuWO <sub>4</sub> /rGO                             | Hydrothermal             | 0.5M KOH    | 270                   | 110               | [15]            |
| CuW/gCN                                            | Microwave<br>irradiation | 1M KOH      | 430                   | 104               | Present<br>Work |

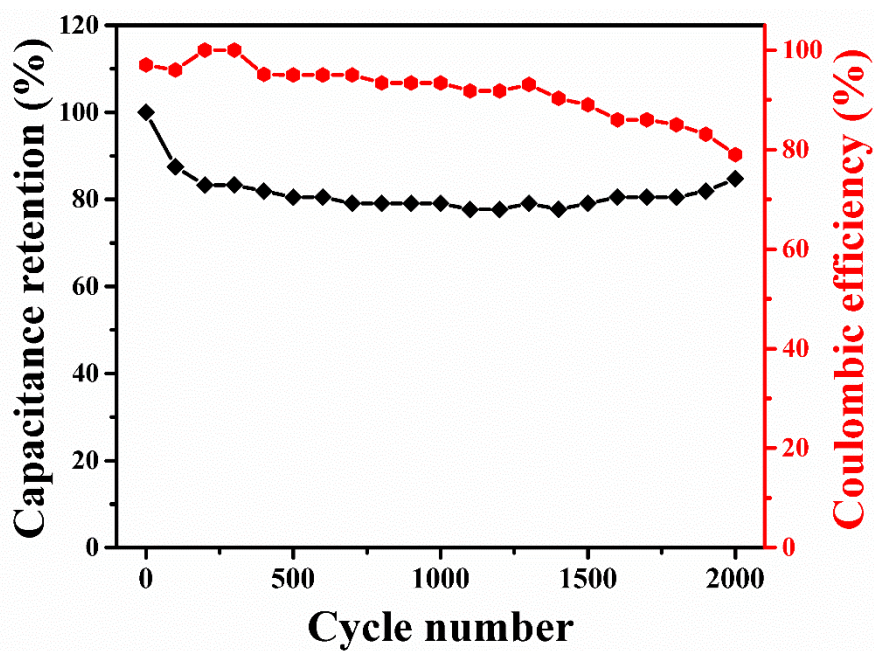

Fig. S4. Capacitance retention (black diamonds) and Coulombic efficiency (red hexagons) of the CuW/gCN electrode.

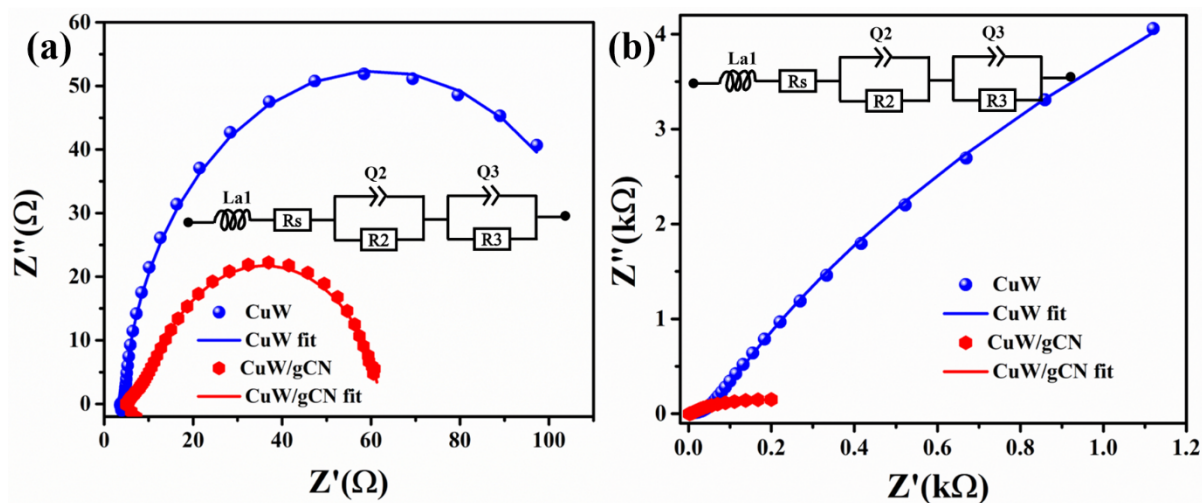

Fig. S5. EIS Nyquist plots of the electrodes in the frequency range 0.01 Hz to 100 kHz. (a) in 0.5M H<sub>2</sub>SO<sub>4</sub> (b) in 1M KOH.



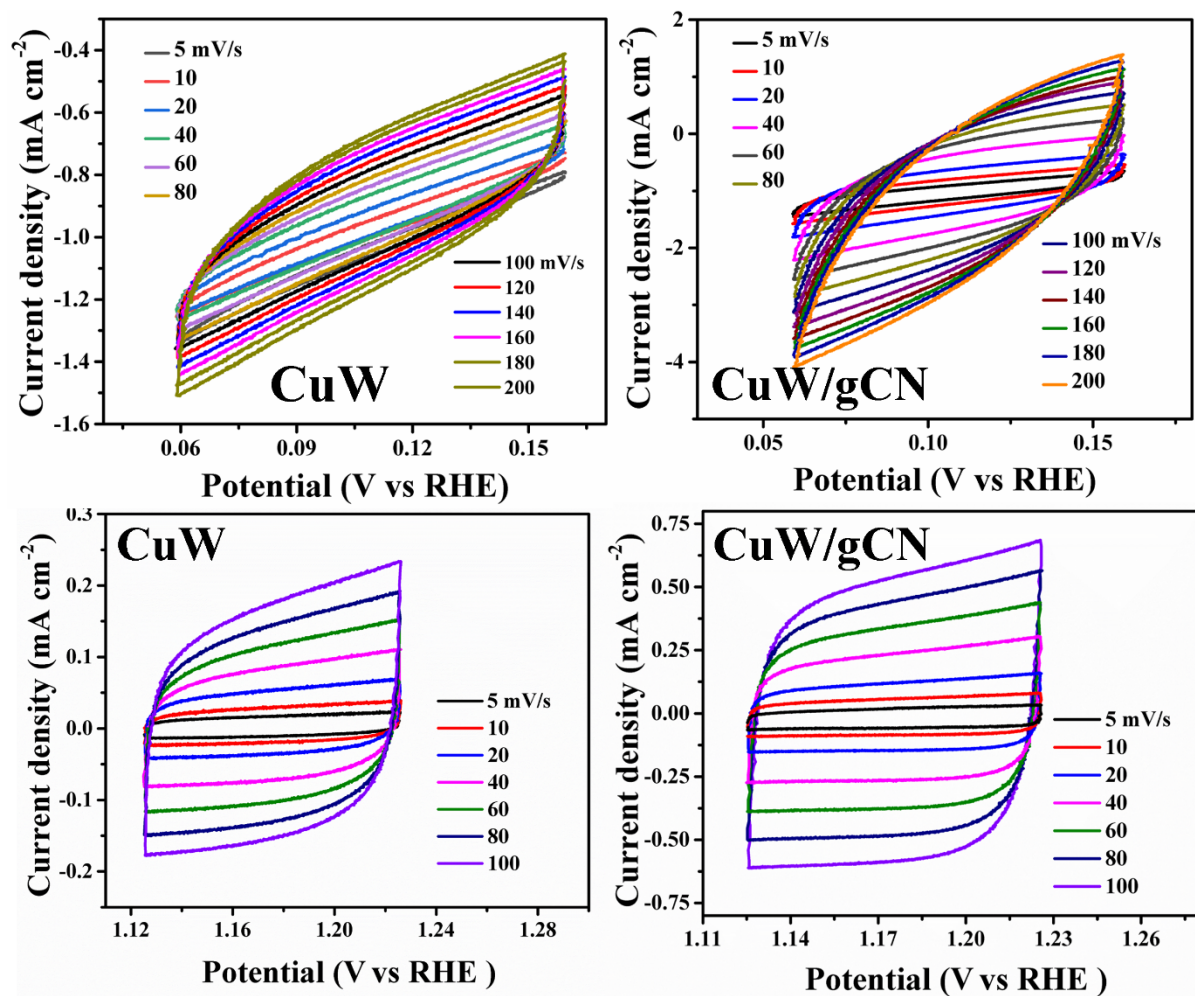

Fig. S6. CV curves of CuW and CuW/gCN electrodes in the non-Faradaic region at different scan rates. Upper layer: HER (in 0.5M H<sub>2</sub>SO<sub>4</sub>) and lower layer: OER (in 1M KOH).

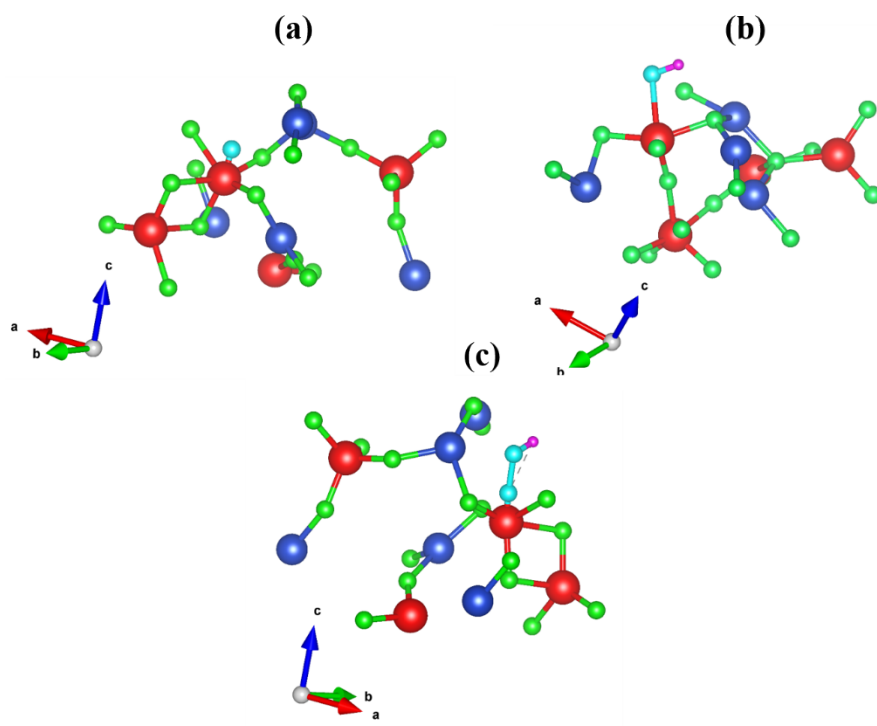

Fig. S7 DFT relaxed configuration for adsorbed species of (a) O, (b) OH, and (c) OOH on the CuW. Blue, red, green, sky blue and magenta color represent the Cu, W, O, O (adsorbed species) and H atom respectively.

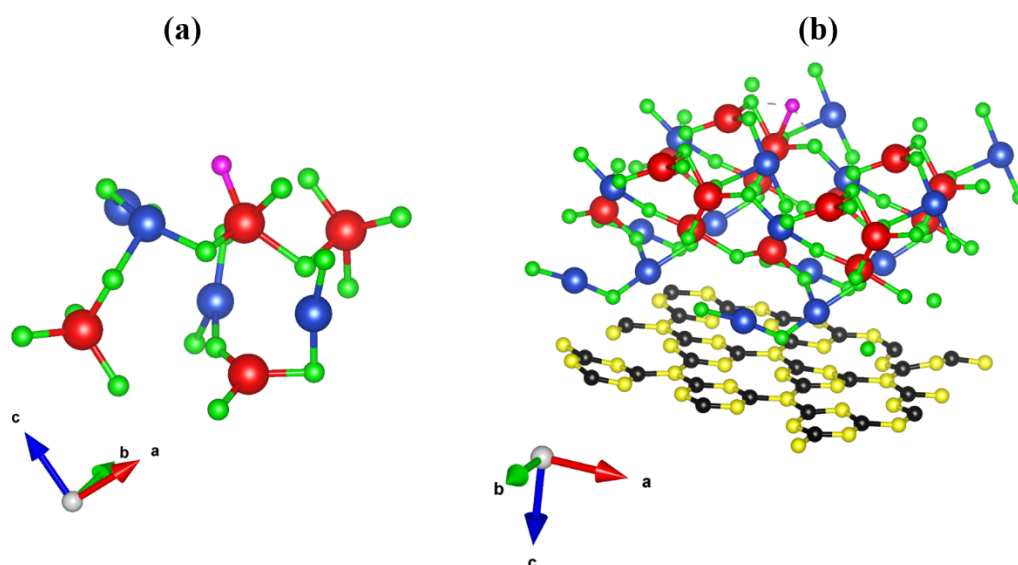

Fig. S8. H adsorption on the surface of (a) CuW and (b) CuW/gCN. Blue, red, green, yellow, black, and magenta color represent Cu, W, O, N, C and H atom, respectively.

Table S4. Comparison of experimental and computed values of overpotential for OER

| System  | Overpotential (mV) |          |
|---------|--------------------|----------|
|         | Experimental       | Computed |
| CuW     | 530                | 587.25   |
| CuW/gCN | 430                | 493.68   |

Table S5. Comparison of experimental and computed values of overpotential for HER

| System  | Overpotential (mV) |          |
|---------|--------------------|----------|
|         | Experimental       | Computed |
| CuW     | 325                | 383.62   |
| CuW/gCN | 143                | 205.34   |



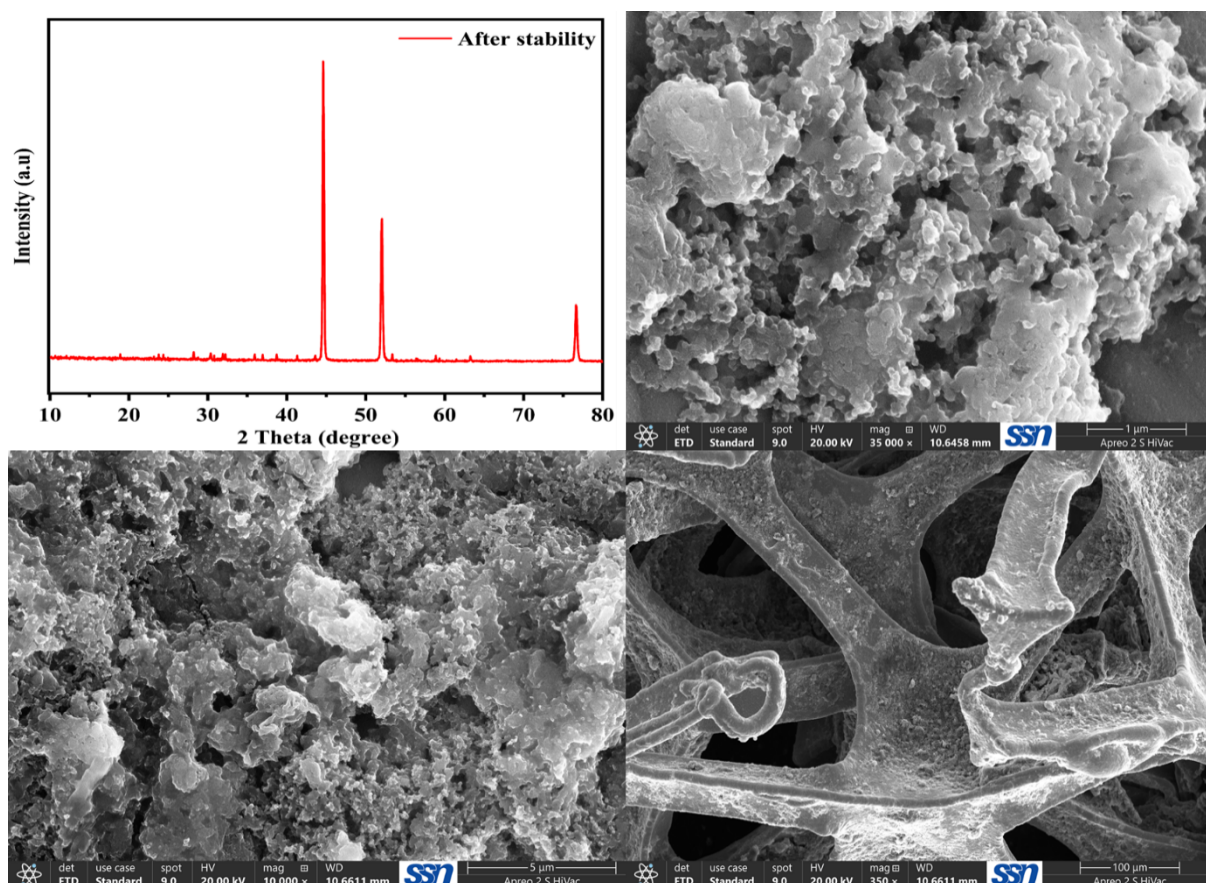

Fig. S9. (a) Xrd graph of post- stability CuW/gCN electrode. (b, c, d) SEM micrographs of post stability CuW/ gCN respectively (low to high magnifications).

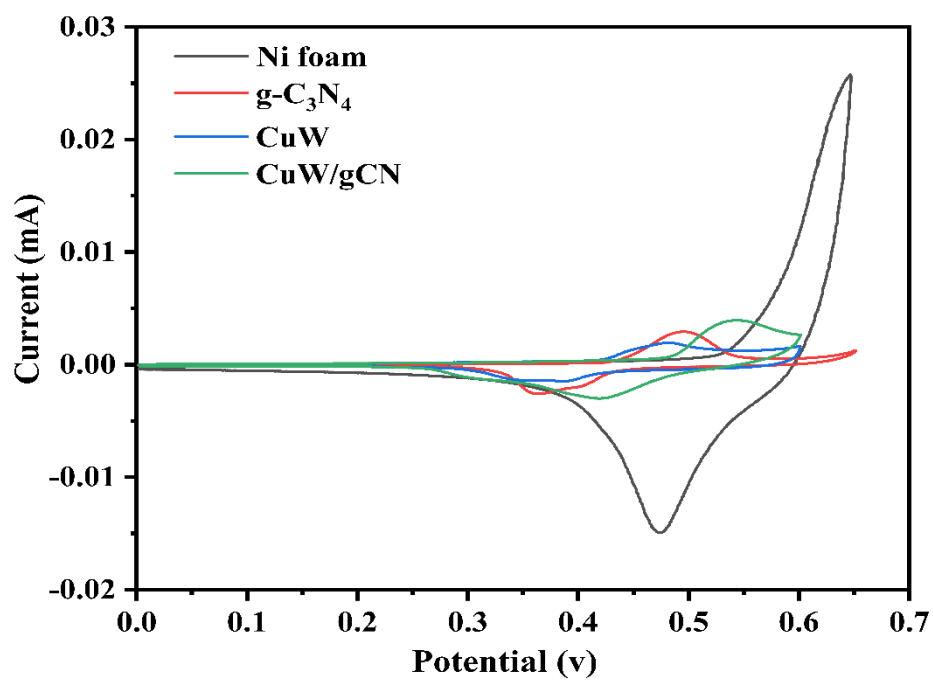

Fig. S10. (a) Comparative CV graphs at scan rate of 20mV/s

## References:

1. Ede, S.R., et al., *Bio-molecule Assisted Aggregation of ZnWO<sub>4</sub> Nanoparticles (NPs) into Chain-like Assemblies: Material for High Performance Supercapacitor and as Catalyst for Benzyl Alcohol Oxidation*. Inorganic Chemistry, 2015. **54**(8): p. 3851-3863.
2. Dhilip Kumar, R., et al., *Synthesis of nanostructured Cu-WO<sub>3</sub> and CuWO<sub>4</sub> for supercapacitor applications*. Journal of Materials Science: Materials in Electronics, 2016. **27**(3): p. 2926-2932.
3. Yang, S., et al., *Controllable ZnFe<sub>2</sub>O<sub>4</sub>/reduced graphene oxide hybrid for high-performance supercapacitor electrode*. Electrochimica Acta, 2018. **268**: p. 20-26.
4. Samantaray, K.S., S. Sahoo, and C.S. Rout, *Hydrothermal synthesis of CuWO<sub>4</sub>-reduced graphene oxide hybrids and supercapacitor application*. Am. J. Eng. Applied Sci, 2016. **9**: p. 584-590.
5. Yue, X., et al., *Overall water splitting on NiO. 19WO<sub>4</sub> nanowires as highly efficient and durable bifunctional non-precious metal electrocatalysts*. Electrochimica Acta, 2020. **333**: p. 135554.
6. Lee, J., et al., *Electrochemical behavior of the flower shaped CoMn<sub>2</sub>O<sub>4</sub> spinel structure assembled for effective HER from water splitting*. Electrochimica Acta, 2021. **379**: p. 138168.
7. Guo, K., et al., *In Situ Activated Co<sub>3-x</sub>Ni<sub>x</sub>O<sub>4</sub> as a Highly Active and Ultrastable Electrocatalyst for Hydrogen Generation*. ACS Catalysis, 2021. **11**(13): p. 8174-8182.
8. Hai, G., et al., *Hierarchical W<sub>18</sub>O<sub>49</sub>/NiWO<sub>4</sub>/NF heterojunction with tuned composition and charge transfer for efficient water splitting*. Applied Surface Science, 2021. **562**: p. 150145.
9. Zhang, N., et al., *Novel Bifunctional Nitrogen Doped MoS<sub>2</sub>/COF-C<sub>4</sub>N Vertical Heterostructures for Electrocatalytic HER and OER*. Catalysts, 2023. **13**(1): p. 90.
10. Alotaibi, N.H., et al., *Rational development of PPy/CuWO<sub>4</sub> nanostructure as competent electrocatalyst for oxygen evolution, and hydrogen evolution reactions*. International Journal of Hydrogen Energy, 2024. **59**: p. 1326-1334.
11. Brijesh, K., et al., *Chemically prepared Polypyrrole/ZnWO<sub>4</sub> nanocomposite electrodes for electrocatalytic water splitting*. International journal of hydrogen energy, 2019. **44**(2): p. 757-767.
12. Peng, J., et al., *Oxygen doped MoS<sub>2</sub> quantum dots for efficient electrocatalytic hydrogen generation*. The Journal of Chemical Physics, 2020. **152**(13).
13. Alshehri, S.M., et al., *Synthesis, characterization, multifunctional electrochemical (OGR/ORR/SCs) and photodegradable activities of ZnWO<sub>4</sub> nanobricks*. Journal of Sol-Gel Science and Technology, 2018. **87**: p. 137-146.
14. Tantraviwat, D., et al., *Structural properties of tungsten-doped cobalt molybdate and its application in electrochemical oxygen evolution reaction*. Journal of Materials Science: Materials in Electronics, 2018. **29**: p. 13103-13111.
15. Ahmed, J., et al., *Investigation of enhanced electro-catalytic HER/OER performances of copper tungsten oxide@ reduced graphene oxide nanocomposites in alkaline and acidic media*. New Journal of Chemistry, 2022. **46**(3): p. 1267-1272.
